# Supplementary material for: A square-pyramidal coordinated copper(ii) hydrazine dimeric complex showing reversible phase transition, dielectric anomaly and thermochromism
Source: Royal Society of Chemistry journal article supplement (doi:10.1039/d0nj04668j), 2020-01-01
Supplement: d0nj04668j1.pdf [file d0nj04668j1.pdf]

ESI

**A square-pyramidal coordinated copper(II) hydrazine dimeric complex showing reversible phase transition, dielectric anomaly and thermochromism**

Shangxue Ke, Mingli Li, Wenjun Rao, Zhenhong Wei\*, Hu Cai\*

College of Chemistry, Nanchang University, Nanchang, 330031, P. R. China.

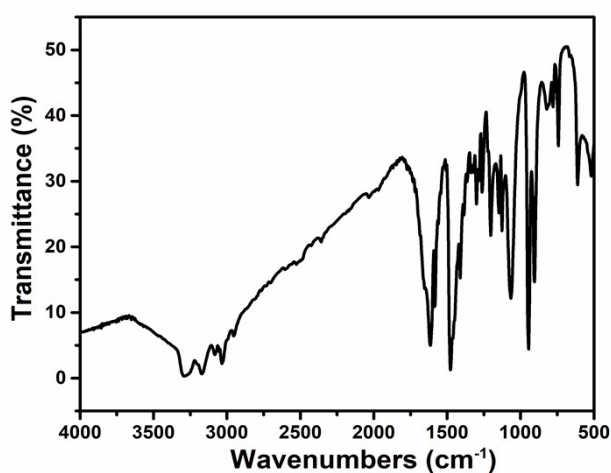

**Figure S1.** The IR spectrum of **1**

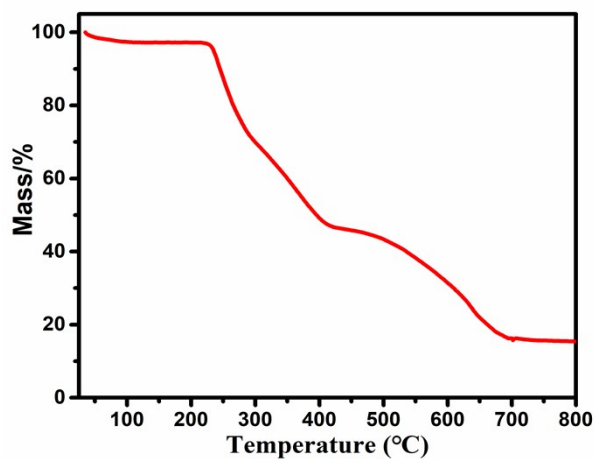

**Figure S2.** The TG cure of compound **1**.
